# Supplementary material
Source: ML conference proceedings conference paper supplement (https://proceedings.mlr.press/v108/mehrabian20a.html)
Supplement: Supplementary file 1 [file mehrabian20a-supp.zip]

Archive with 8 entries (7 files):
- 454-fullpaper.pdf
- code/
- code/gotv2.cpp
- code/m-etc-elim.cpp
- code/multiplayer_bandits.h
- code/params.txt
- code/readme.txt
- code/selfishucb.cpp
