# Supplementary material
Source: ML conference proceedings conference paper supplement (https://proceedings.mlr.press/v108/mehrabian20a.html)
Supplement: Supplementary file 1 [file mehrabian20a-supp.zip › code/params.txt]

2 3 
0.1   0.05  0.9
0.1   0.25  0.3
Gaussian 0.05
1000 10 100000
10


3 3 
0.1   0.05  0.9
0.1   0.25   0.3
0.4 0.2  0.8
gaussian 0.05
100 2 14000000
100


5 5 
0.5 		0.49 	0.39 	0.29 		0.5
0.5 		0.49 	0.39 	0.29 		0.19
0.29 		0.19 	0.5 	0.499 		0.39
0.29 		0.49 	0.5 	0.5    		0.39
0.49 		0.49 	0.49 	0.49 		0.5
bernoulli
100  2 14000000
100


3 3
0.1   0.05  0.9
0.1   0.25   0.3
0.4 0.2  0.8
bernoulli
1000000 10 1000000
1


3 3 1
0.5   	0.1   	0.4
0.2   	0.5    	0.1
0.6 	0.2  	0.5
bernoulli
1000000 10 1000000

3 5 100
0 0 1 1 1
0 0 1 1 1
0 0 1 1 1
Gaussian 0.05
100 10 1000000

5 5 100
1 		0.99 0.89 	0.79 1
1 		0.99 0.89 	0.79 0.69
0.79 	0.69 1 		0.999 0.89
0.79 	0.99 1 		1    0.89
0.99 	0.99 0.99 	0.99 1
Gaussian 0.05
100  10 1000000


1 		0.99 0.89 	0.79 1
1 		0.99 0.89 	0.79 0.69
0.79 	0.69 1 		0.999 0.89
0.79 	0.99 1 		1    0.89
0.99 	0.99 0.99 	0.99 1
bernoulli
100   10 1000000


3 3 100
0.5   	0.1   	0.4
0.2   	0.5    	0.1
0.6 	0.2  	0.5
Gaussian 0.05
100 10 1000000


2 2 1
1 0.999
1 1
bernoulli
100 10 100000000000


5 5 1
1 		1 	0.99 	0.99 	1
1 		0.99 0.99 	0.99 	0.99
0.99 	0.99 1 		0.999 	0.99
0.99 	0.99 1 		1    	0.99
0.99 	0.99 0.99 	0.99 	1
bernoulli
10000 10 1000000


3 3 100
0.5   	0.1   	0.4
0.2   	0.5    	0.1
0.6 	0.2  	0.5
Gaussian 0.05
100 10 1000000


2 2 1
0.9 0.1               
0.1 0.9
bernoulli
100 10 1000000000


7 8 1
0.9 0.1 0.1 0.1 0.1 0.1 0.1 0.1 
0.1 0.9 0.1 0.1 0.1 0.1 0.1 0.1 
0.1 0.1 0.9 0.1 0.1 0.1 0.1 0.1 
0.1 0.1 0.1 0.9 0.1 0.1 0.1 0.1 
0.1 0.1 0.1 0.1 0.9 0.1 0.1 0.1 
0.1 0.1 0.1 0.1 0.1 0.9 0.1 0.1 
0.1 0.1 0.1 0.1 0.1 0.1 0.9 0.1 
bernoulli
1000000 10 1000000


3 3 10
0.9 0.1 0.1               
0.1 0.9 0.1            
0.1 0.1 0.9               
bernoulli
1000000 10 1000000


4 4 10
0.9 0.1 0.1 0.1           
0.1 0.9 0.1 0.1           
0.1 0.1 0.9 0.1           
0.1 0.1 0.1 0.9           
bernoulli
1000000 10 1000000


5 5 10
0.9 0.1 0.1 0.1 0.1       
0.1 0.9 0.1 0.1 0.1          
0.1 0.1 0.9 0.1 0.1       
0.1 0.1 0.1 0.9 0.1          
0.1 0.1 0.1 0.1 0.9       
bernoulli
1000000 10 1000000


6 6 10
0.9 0.1 0.1 0.1 0.1 0.1         
0.1 0.9 0.1 0.1 0.1 0.1         
0.1 0.1 0.9 0.1 0.1 0.1   
0.1 0.1 0.1 0.9 0.1 0.1         
0.1 0.1 0.1 0.1 0.9 0.1   
0.1 0.1 0.1 0.1 0.1 0.9         
bernoulli
1000000 10 1000000

7 7 10
0.9 0.1 0.1 0.1 0.1 0.1 0.1     
0.1 0.9 0.1 0.1 0.1 0.1 0.1     
0.1 0.1 0.9 0.1 0.1 0.1 0.1  
0.1 0.1 0.1 0.9 0.1 0.1 0.1     
0.1 0.1 0.1 0.1 0.9 0.1 0.1  
0.1 0.1 0.1 0.1 0.1 0.9 0.1     
0.1 0.1 0.1 0.1 0.1 0.1 0.9  
bernoulli
1000000 10 1000000


8 8 1
0.9 0.1 0.1 0.1 0.1 0.1 0.1 0.1 
0.1 0.9 0.1 0.1 0.1 0.1 0.1 0.1 
0.1 0.1 0.9 0.1 0.1 0.1 0.1 0.1 
0.1 0.1 0.1 0.9 0.1 0.1 0.1 0.1 
0.1 0.1 0.1 0.1 0.9 0.1 0.1 0.1 
0.1 0.1 0.1 0.1 0.1 0.9 0.1 0.1 
0.1 0.1 0.1 0.1 0.1 0.1 0.9 0.1 
0.1 0.1 0.1 0.1 0.1 0.1 0.1 0.9 
bernoulli
1000000 10 1000000


3 3 100
1   	0.9   	0.8
0.9   	0.8  	0
0.8 	0.0  	0.0
Gaussian 0.05
1000 10 1000000


3 3 1
0.8 0 0.9
0.9 0.9 0
0.9 0 0.9 
bernoulli
100 10 1000


Gaussian 0.05
